# Supplementary material
Source: PubMed Central journal article supplement (PMC6035775)
Supplement: NIHMS972304-supplement-supplement_1.pdf [file NIHMS972304-supplement-supplement_1.pdf]

Supplemental

**Supplemental Table 1: Clinical Trials of Biologic Agents in Eosinophilic Esophagitis and Gastroenteritis**

| Target | Agent                      | Study Design                                       | Patients                                                           | Age (years)           | Duration   | Primary Endpoint                                                           | Results                                                                | Secondary Endpoints                                   |
|--------|----------------------------|----------------------------------------------------|--------------------------------------------------------------------|-----------------------|------------|----------------------------------------------------------------------------|------------------------------------------------------------------------|-------------------------------------------------------|
| IgE    | Omalizumab <sup>66</sup>   | Randomized, double-blind, placebo-controlled trial | Eosinophilic esophagitis (n=30)                                    | 3 children, 27 adults | 16 weeks   | Esophageal pathology (peak esophageal eos/hpf)                             | No significant reduction in esophageal eosinophils compared to placebo | No improvement in dysphagia score (non-validated PRO) |
|        | Omalizumab <sup>108</sup>  | Open label                                         | Eosinophilic esophagitis (n=24)                                    | 14-71                 | 12 weeks   | Esophageal pathology (% reduction in peak esophageal eos/hpf) and symptoms | 33% achieved pathologic endpoint with omalizumab                       | 47% of patients with symptom improvement              |
| IL-5   | Benralizumab <sup>91</sup> | Open label                                         | Hypereosinophilic syndrome with gastrointestinal involvement (n=7) | 18-65                 | 12 weeks   | Gastrointestinal pathology (peak eos/hpf)                                  | Significant improvement in pathology                                   |                                                       |
|        | Mepolizumab <sup>86</sup>  | Open label                                         | Eosinophilic esophagitis (n=4)                                     | 18-57                 | 12 weeks   | Esophageal pathology (mean and maximum eos/hpf)                            | Significant improvement in pathology                                   | Significant improvement in peripheral eosinophilia    |
|        | Mepolizumab <sup>87</sup>  | Randomized, double-blind,                          | Eosinophilic esophagitis                                           | adults                | 4-13 weeks | Esophageal pathology                                                       | No significant improvement                                             | Significant reduction in                              |

|           |                           |                                                    |                                  |       |          |                                                                                                        |                                                                                                                                              |                                                                                                        |
|-----------|---------------------------|----------------------------------------------------|----------------------------------|-------|----------|--------------------------------------------------------------------------------------------------------|----------------------------------------------------------------------------------------------------------------------------------------------|--------------------------------------------------------------------------------------------------------|
|           |                           | placebo-controlled trial                           | (n=11)                           |       |          | (peak eos/hpf <5)                                                                                      | (no patients in either arm achieved primary endpoint)                                                                                        | mean eos/hpf                                                                                           |
|           | Mepolizumab <sup>88</sup> | Randomized, double-blind, parallel group           | Eosinophilic esophagitis (n=59)  | 2-17  | 12 weeks | Esophageal pathology (% of patients with peak eos/hpf <5)                                              | 8.8% achieved pathologic endpoint with mepolizumab                                                                                           | Significant reduction in peak and mean eos/hpf; No significant symptom improvement (non-validated PRO) |
|           | Reslizumab <sup>89</sup>  | Randomized, double-blind, placebo-controlled trial | Eosinophilic esophagitis (n=226) | 5-18  | 16 weeks | Co-primary: Esophageal pathology (% change in peak eos/hpf); Physician's global assessment of symptoms | Significant improvement in pathology with reslizumab (59-67%) compared to placebo (24%); No significant improvement in symptoms over placebo | No significant change in Children's Health Questionnaire over placebo                                  |
| TNF-alpha | Infliximab <sup>109</sup> | Open label                                         | Eosinophilic esophagitis (n=3)   | 34-41 | 4 weeks  | Esophageal pathology (eos/hpf)                                                                         | No significant decrease in counts                                                                                                            | Symptom improvement in 2/3 patients                                                                    |
| IL-13     | QAX576 <sup>104</sup>     | Randomized, double-blind, placebo-controlled trial | Eosinophilic esophagitis (n=25)  | 18-50 | 12 weeks | Esophageal pathology (% of patients with 75% reduction                                                 | QAX576 40% compared to placebo 13% (NSS)                                                                                                     | Significant improvement in mean eosinophil count with                                                  |

|            |                         |                                                    |                                 |       |          |                                                             |                                                                                   |                                                                                                                                              |
|------------|-------------------------|----------------------------------------------------|---------------------------------|-------|----------|-------------------------------------------------------------|-----------------------------------------------------------------------------------|----------------------------------------------------------------------------------------------------------------------------------------------|
|            |                         |                                                    |                                 |       |          | in peak eos/hpf)                                            |                                                                                   | QAX576; No difference in Mayo Dysphagia Questionnaire                                                                                        |
|            | RPC4046 <sup>20</sup>   | Randomized, double-blind, placebo-controlled trial | Eosinophilic esophagitis (n=99) | 18-65 | 16 weeks | Esophageal pathology (Change from baseline in mean eos/hpf) | RPC4046 180 mg -94.76 (p<0.0001); RPC4046 360 mg -99.90 (p<0.0001); Placebo -4.42 | Significant improvement in endoscopic features (EREFS); Trend for improvement in symptoms of dysphagia                                       |
| IL-4Ralpha | Dupilumab <sup>21</sup> | Randomized, double-blind, placebo-controlled trial | Eosinophilic esophagitis (n=47) | 18-65 | 12 weeks | Dysphagia (Straumann Dysphagia Index, non-validated PRO)    | Significant improvement in symptoms compared to placebo                           | Significant improvement in % change in peak esophageal eos/hpf (dupilumab - 92.9%; placebo +14.2%; p<0.0001) and endoscopic features (EREFS) |
